# Supplementary material for: Infant Formula With a Specific Blend of Five Human Milk Oligosaccharides Drives the Gut Microbiota Development and Improves Gut Maturation Markers: A Randomized Controlled Trial
Source: PubMed Central journal article supplement (PMC9298649; doi:10.3389/fnut.2022.920362), 2022-07-06
Supplement: Image_3.pdf [file Image_3.pdf]

**A Clostridia**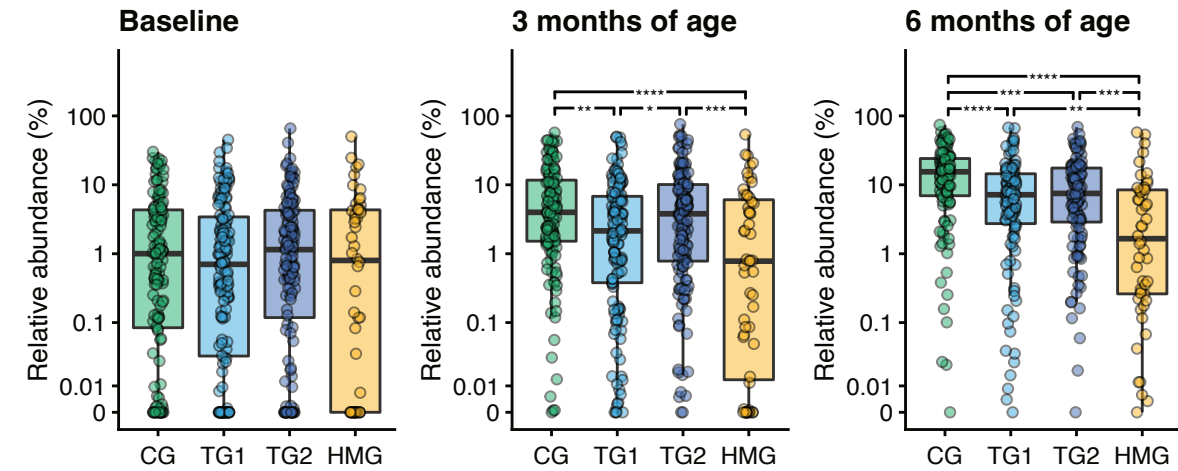**B *Lactobacillus***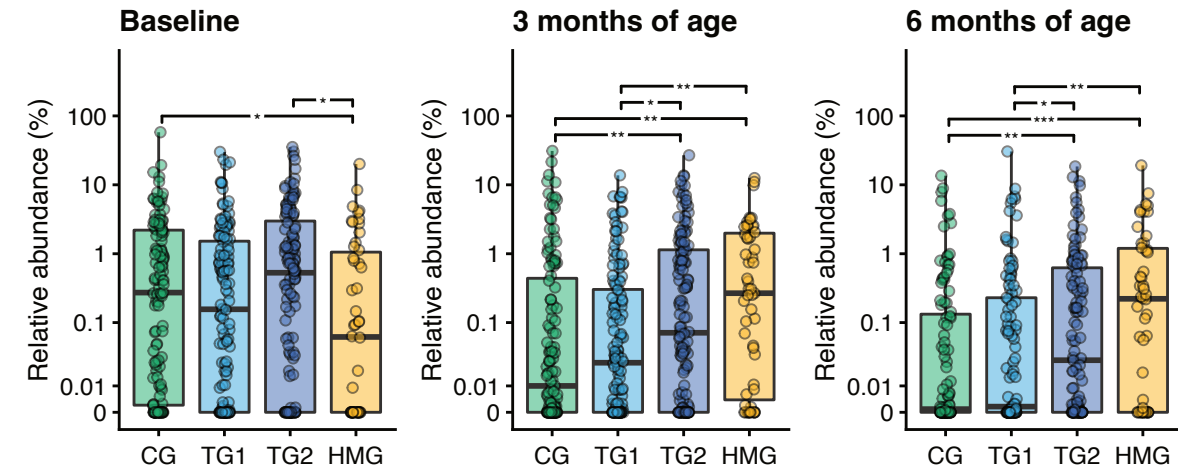**C Peptostreptococcaceae**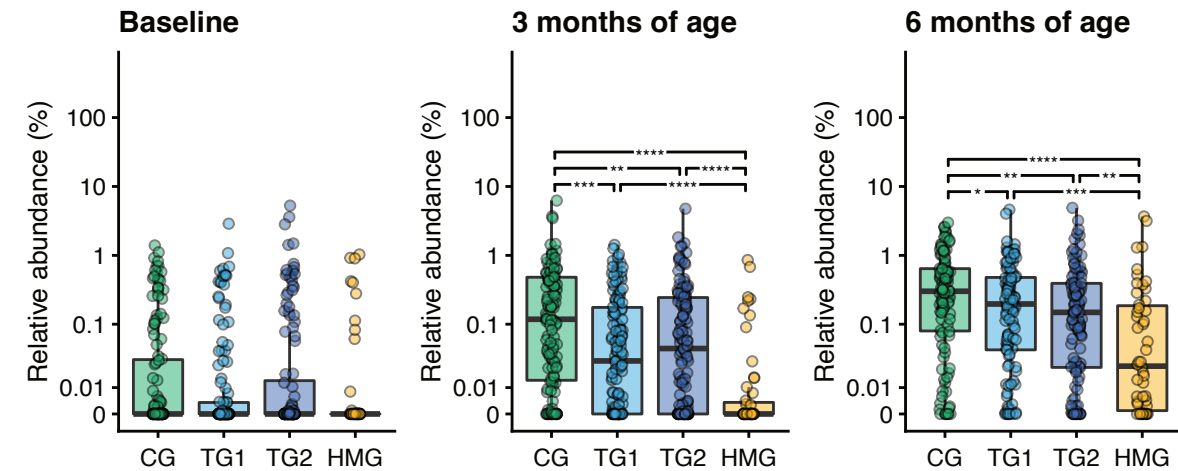**D *Streptococcus***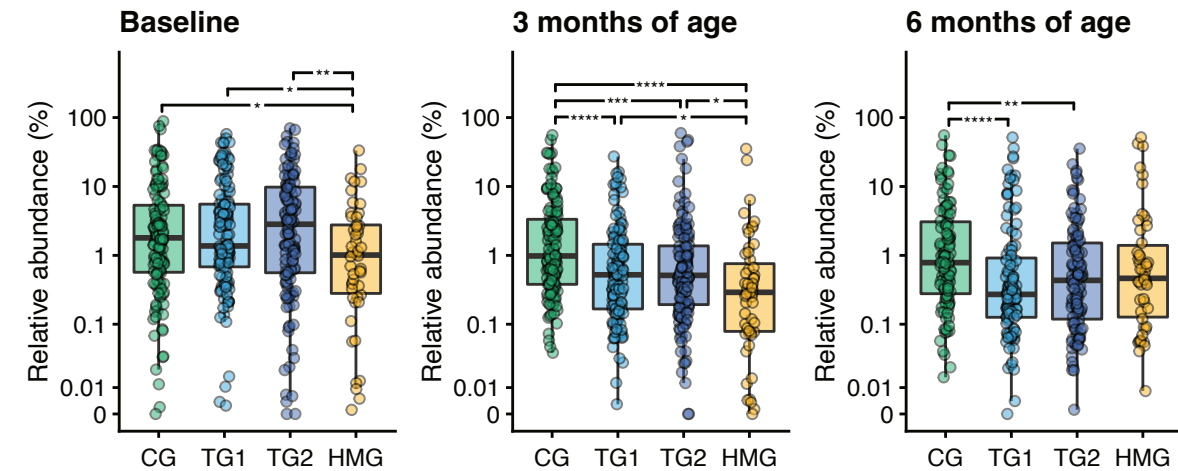**Supplementary Figure 3:**

Relative abundance of selected taxa in the four feeding groups at each timepoint (baseline left, 3 months of age center, 6 months of age right). Within each timepoint, all feeding groups were compared pairwise and significant differences (Dunn's test) are highlighted with significance bars. Figures are plotted on a pseudo-logarithmic scale in order to display values spanning several orders of magnitude as well as zeros. Box plots show the median and 25<sup>th</sup> and 75<sup>th</sup> percentiles with Tukey whiskers. At baseline/3/6 month of age, CG, n=135/135/111; TG1, n=140/138/113; TG2, n=136/140/117; HMG, n=50/55/50. \*: P<0.05, \*\*: P<0.01, \*\*\*: P<0.001, \*\*\*\*: P<0.0001.
